# Supplementary material
Source: HighWire-hosted journal article supplement (https://www.jrheum.org/highwire/filestream/42143/field_highwire_adjunct_files/0/211200DataSuppl.pdf)
Supplement: 211200DataSuppl.pdf [file 211200DataSuppl.pdf]

**Supplementary Methods:**

SLE and MAS clinical features included were: fever, malar rash, photosensitivity, oral or nasal ulcers, alopecia, arthritis, serositis (pericarditis, pleuritis, or peritonitis), nephritis, neuropsychiatric symptoms (delirium, psychosis, or seizures), and headaches.

Patients with clinical evidence of lupus nephritis underwent kidney biopsy and were classified based on WHO (World Health Organization) and/or ISN (International Society of Nephrology) categories: mesangial (class II), membranous (class V), and/or proliferative (class III or IV) nephritis classes.<sup>7</sup>

The cSLE laboratory features included in Table 1 were: white blood cell (WBC or leukocytes), and thrombocytes, lymphocytes, DAT (Direct Antiglobulin Test) or Coombs status, and complement levels (C3, C4). Autoantibody status was reported for anti-nuclear antibodies (ANA), anti-double stranded DNA (dsDNA), anti-Smith (Sm), and anti-phospholipid antibodies (anti-cardiolipin [ACL], and lupus anticoagulant [LAC]). Additional laboratory features assessed in the MAS patients (Supplementary Table 1) were: hemoglobin, erythrocyte sedimentation rate (ESR), C-reactive protein (CRP), Ferritin, aspartate aminotransferase (AST), alanine aminotransferase (ALT), lactose dehydrogenase (LDH), prothrombin time (PTT), d-Dimer, fibrinogen and triglycerides. Ten of the 19 MAS patients underwent bone marrow aspirate to look for hemophagocytosis.

**Supplementary Table S1. Frequency of clinical and laboratory MAS features in the childhood-onset systemic lupus erythematosus (cSLE) patient with Macrophage activation syndrome (MAS) (n=19)**

|                                                                      | Total (%)     | Median (IQR) <sup>a</sup> |
|----------------------------------------------------------------------|---------------|---------------------------|
| <b><i>Clinical features:</i></b>                                     |               |                           |
| Fever <sup>b</sup>                                                   | 18 (95)       |                           |
| Generalized lymphadenopathy                                          | 7 (37)        |                           |
| CNS dysfunction <sup>c</sup>                                         | 6 (35)        |                           |
| Hepatomegaly <sup>d</sup>                                            | 4 (21)        |                           |
| Splenomegaly                                                         | 5 (26)        |                           |
| Hemorrhage <sup>e</sup>                                              | 3 (18)        |                           |
| <b><i>Laboratory features<sup>f</sup>:</i></b>                       |               |                           |
| Hemoglobin                                                           | 17 (89)       | 99.00 (83.00-109.50)      |
| WBC                                                                  | 14 (74)       | 2.50 (1.70-5.10)          |
| Neutrophils                                                          | 11 (58)       | 1.20 (1.00-3.30)          |
| Platelet count                                                       | 11 (58)       | 105.00 (88.50-177.50)     |
| ESR                                                                  | 16 (84)       | 57.00 (40.00-109.50)      |
| CRP (n=17)                                                           | 10 (59)       | 2.80 (0.90-21.40)         |
| Ferritin                                                             | 19 (100)      | 2212 (1035-4566)          |
| AST                                                                  | 19 (100)      | 91 (58-196)               |
| ALT                                                                  | 15 (79)       | 73.00 (49.00-132.50)      |
| LDH                                                                  | 19 (100)      | 1140 (848-1381)           |
| PTT                                                                  | 7 (37)        | 32.50 (30.30-39.30)       |
| d-Dimer                                                              | 19 (100)      | 2200 (1848-3008)          |
| Fibrinogen                                                           | 3 (16)        | 3.00 (2.50 - 3.40)        |
| Triglycerides (n=17)                                                 | 13 (76)       | 2.70 (2.00-3.50)          |
| <b><i>Hemophagocytosis in bone marrow aspirate/biopsy (n=10)</i></b> | <b>1 (10)</b> |                           |

<sup>a</sup> The median and interquartile range [IQR 25%-75%] values for the most abnormal laboratory value at MAS presentation and prior to MAS treatment.

<sup>b</sup>  $\geq 38.0$  degrees Celsius.

<sup>c</sup> irritability, disorientation, lethargy, headache, seizures, or coma (excluding infection, drugs, or metabolic causes)

<sup>d</sup> as per imaging and/or physical examination.

<sup>e</sup> pulmonary hemorrhage, cerebral hemorrhage, hematochezia, epistaxis, or gum bleeding with heavy menstruation.

<sup>f</sup> Total (%) are the proportion of MAS patients with abnormal Hospital for Sick Children (HSC) laboratory reference values at time of MAS diagnosis and prior to MAS treatment.

MAS: macrophage activation syndrome; cSLE: childhood-onset systemic lupus erythematosus; CNS: central nervous system, WBC: white blood cells; ESR: erythrocyte sedimentation rate; CRP: C-reactive protein; AST: aspartate aminotransferase; ALT: alanine aminotransferase; LDH: lactose dehydrogenase; PTT: prothrombin time.

**Supplementary Table S2. HLH low-frequency non-synonymous variants in childhood-onset systemic lupus erythematosus (cSLE) patients without Macrophage activation syndrome (MAS)**

| Chr | Start Position | Gene         | Ref/Alt Allele | SNP <sup>a</sup> | AA change    | CADD score <sup>b</sup> | MAS MAF <sup>c</sup> | Non-MAS MAF <sup>c</sup> | Referent population <sup>d</sup> |          |
|-----|----------------|--------------|----------------|------------------|--------------|-------------------------|----------------------|--------------------------|----------------------------------|----------|
|     |                |              |                |                  |              |                         |                      |                          | MAF                              | Ancestry |
| 1   | 235872503      | <i>LYST</i>  | G/A            | NR <sup>e</sup>  | A3344V       | 33.00                   | 0                    | 8.06E-03                 | NR                               | ADM      |
| 1   | 235878543      | <i>LYST</i>  | C/T            | rs543359025      | V3248I       | 27.90                   | 0                    | 8.06E-03                 | 7.51E-04                         | SAS      |
| 1   | 235922341      | <i>LYST</i>  | T/C            | rs112601869      | D2271G       | 22.80                   | 0                    | 8.06E-03                 | 0.02                             | AFR      |
| 1   | 235938235      | <i>LYST</i>  | A/G            | rs559869925      | I1871T       | 21.00                   | 0                    | 8.06E-03                 | 4.52E-03                         | SAS      |
| 1   | 235938329      | <i>LYST</i>  | A/C            | rs115330112      | S1840A       | 18.55                   | 0                    | 8.06E-03                 | 4.39E-03                         | ADM      |
| 1   | 235940415      | <i>LYST</i>  | C/G            | rs773800745      | G1803A       | 21.80                   | 0                    | 8.06E-03                 | 7.97E-06                         | ADM      |
| 1   | 235945254      | <i>LYST</i>  | C/T            | rs149991106      | D1666N       | 20.40                   | 0                    | 8.06E-03                 | 1.85E-04                         | AFR      |
| 1   | 235956873      | <i>LYST</i>  | A/T            | NR               | M1349K       | 24.20                   | 0                    | 8.06E-03                 | NR                               | EUR      |
| 1   | 235969405      | <i>LYST</i>  | T/C            | rs145666408      | K1011E       | 13.30                   | 0                    | 8.06E-03                 | 1.99E-05                         | ADM      |
| 1   | 235969976      | <i>LYST</i>  | A/C            | rs35261143       | F820L        | 18.02                   | 0                    | 8.06E-03                 | 1.06E-04                         | EUR      |
| 1   | 235972734      | <i>LYST</i>  | G/A            | rs77848653       | P462S        | 13.59                   | 0                    | 8.06E-03                 | 9.05E-03                         | AFR      |
| 1   | 235973750      | <i>LYST</i>  | T/C            | rs3768067        | H123R        | 12.67                   | 0                    | 8.06E-03                 | 8.77E-04                         | ADM      |
| 2   | 32449832       | <i>NLRC4</i> | C/A            | rs61754192       | A929S, A264S | 5.58                    | 0                    | 8.06E-03                 | 0.01                             | EUR      |
| 2   | 32463365       | <i>NLRC4</i> | C/A            | rs149451729      | G786V, G121V | 17.64                   | 0                    | 8.06E-03                 | 2.32E003                         | ADM      |
| 3   | 128200715      | <i>GATA2</i> | C/G            | NR               | A350P, A364P | 24.70                   | 0                    | 8.06E-03                 | NR                               | ADM      |
| 5   | 77311370       | <i>AP3B1</i> | C/T            | rs146503597      | V950M, V999M | 13.98                   | 0                    | 0.02                     | 4.13E-03, 6.62E-03               | ADM, EUR |
| 5   | 77335015       | <i>AP3B1</i> | G/T            | rs139344924      | F838L, F887L | 22.50                   | 0                    | 8.06E-03                 | 0.01                             | EUR      |
| 5   | 77406104       | <i>AP3B1</i> | A/T            | rs62001050       | I726K, I775K | 8.27                    | 0                    | 8.06E-03                 | 0.03                             | AFR      |
| 5   | 77461466       | <i>AP3B1</i> | C/G            | rs150000996      | A400P, A351P | 24.80                   | 0                    | 8.06E-03                 | 8.00E-04                         | ADM      |
| 5   | 77471634       | <i>AP3B1</i> | T/C            | rs142025324      | I308V, I357V | 19.00                   | 0                    | 8.06E-03                 | 2.42E-03                         | EUR      |
| 5   | 77477483       | <i>AP3B1</i> | C/T            | NR               | D264N, D215N | 20.90                   | 0                    | 8.06E-03                 | NR                               | EUR      |
| 5   | 156649936      | <i>ITK</i>   | C/T            | rs1156578676     | P187S        | 16.18                   | 0                    | 8.06E-03                 | 1.59E-05                         | ADM      |
| 5   | 156671321      | <i>ITK</i>   | C/A            | rs150270557      | Q428K        | 22.40                   | 0                    | 8.06E-03                 | 1.75E-04                         | ADM      |
| 10  | 72358722       | <i>PRF1</i>  | T/C            | rs28933375       | N252S        | 14.50                   | 0                    | 8.06E-03                 | 6.16E-03                         | EUR      |

|    |                       |               |     |             |                        |       |       |          |                   |          |
|----|-----------------------|---------------|-----|-------------|------------------------|-------|-------|----------|-------------------|----------|
| 10 | 72360387              | <i>PRF1</i>   | G/A | rs35947132  | A91V                   | 23.70 | 0     | 0.02     | 0.05,<br>4.32E-03 | EUR, SAS |
| 14 | 23282336              | <i>SLC7A7</i> | G/A | rs11568438  | A91V, A91E             | 27.50 | 0     | 8.06E-03 | 0.02              | EUR      |
| 14 | 23282544              | <i>SLC7A7</i> | C/T | rs777499742 | D22N                   | 11.15 | 0     | 8.06E-03 | 7.96E-06          | ADM      |
| 17 | 73826491 <sup>f</sup> | <i>UNC13D</i> | G/A | rs35037984  | R928C                  | 15.31 | 0.026 | 0.02     | 0.02, 0.02        | ADM, SAS |
| 17 | 73832719              | <i>UNC13D</i> | C/T | rs200109035 | R411Q                  | 22.50 | 0     | 8.06E-03 | 5.86E-04          | ADM      |
| 19 | 7706658               | <i>STXBP2</i> | C/T | rs181216956 | T166M, T163M,<br>T177M | 4.15  | 0     | 0.02     | 0.02, 0           | EAS, SAS |
| 19 | 7707128               | <i>STXBP2</i> | C/T | rs753879238 | R232W, R246W,<br>R235W | 25.90 | 0     | 8.06E-03 | 0                 | SAS      |
| 19 | 7709596               | <i>STXBP2</i> | G/A | rs114628602 | D399N, D413N,<br>D402N | 25.00 | 0     | 8.06E-03 | 1.12E-04          | ADM      |
| 19 | 7710134               | <i>STXBP2</i> | C/T | rs141309384 | A444V, A433V,<br>A430V | 15.52 | 0     | 0.02     | 8.26E-03,<br>0.01 | ADM, EUR |
| 19 | 7711222               | <i>STXBP2</i> | G/A | rs749915574 | V493I, V479I,<br>V482I | 16.07 | 0     | 8.06E-03 | 1.17E-04          | EAS      |
| 19 | 7712364               | <i>STXBP2</i> | A/G | rs61736586  | R552G, R566G,<br>R555G | 18.00 | 0     | 8.06E-03 | 0.03              | AFR      |
| X  | 77150892              | <i>MAGT1</i>  | G/A | rs140854076 | R6W                    | 14.62 | 0     | 8.06E-03 | 2.33E-03          | ADM      |

<sup>a</sup> dbSNP database <<https://www.ncbi.nlm.nih.gov/snp/>>.

<sup>b</sup> CADD PHRED-scaled score <<https://cadd.gs.washington.edu/>>.

<sup>c</sup> Calculations for MAF in: MAS = # of alleles in cohort/(2\*19); non-MAS = # of alleles in cohort/(2\*62).

<sup>d</sup> Ancestry-specific referent minor allele frequency (MAF) of variant reported, unless SLE cohort variant from admixed population; variants in referent population variant from gnomAD exome dataset or TOPMed accessed on November 19, 2020; when 2 or more patients in the cohort carried the same variant, all referent population MAF were reported in respective order.

<sup>e</sup> NR = Variant not reported in dbSNP or referent population of gnomAD or TOPMed.

<sup>f</sup> Same variant found in MAS (see Table 3) and non-MAS cohorts.

HLH: hemophagocytic lymphohistiocytosis; cSLE: childhood-onset systemic lupus erythematosus; MAS: macrophage activation syndrome; Chr: Chromosome; Ref/Alt: reference/alternative; SNP: single nucleotide polymorphism; AA: amino acid; CADD: CADD: combined annotation dependent depletion; MAF: minor allele frequency; ADM – admixed, AFR – African, EAS – East Asian, EUR- European (non-Finnish), SAS – South Asia.
